# Supplementary material
Source: publisher figshare collection journal article supplement (https://acs.figshare.com/ndownloader/files/4771807)
Supplement: Supplementary file 1 [file 4771807]

# Construction of Size-Controllable Hierarchical Nanoporous TiO<sub>2</sub> Ring Arrays and Their Modifications

Fengqiang Sun, Jimmy C. Yu<sup>\*</sup>, and Xinchun Wang

Department of Chemistry and the Center of Novel Functional Molecules,

The Chinese University of Hong Kong, Shatin, New Territories,

Hong Kong, P. R. China. E-mail: [jimmyyu@cuhk.edu.hk](mailto:jimmyyu@cuhk.edu.hk)

---

## Electronic Supplementary Information

The polystyrene sphere (PS) colloidal monolayer, shown in Fig. S1, was synthesized by spin-coating on glass.

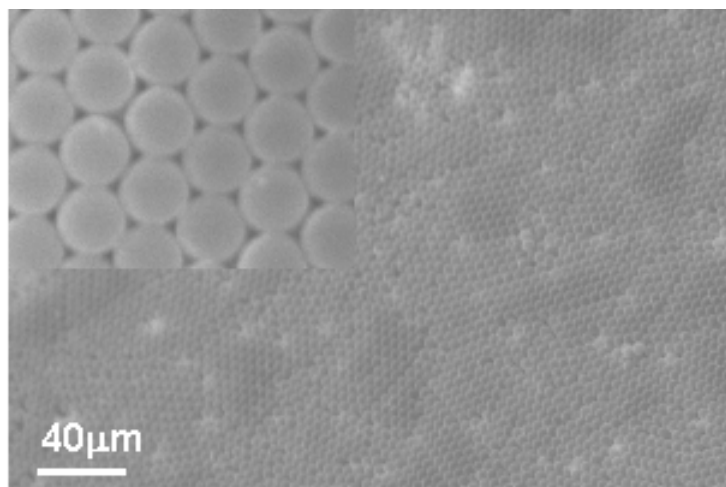

**Fig. S1.** SEM image of 4.5  $\mu\text{m}$  PS colloidal monolayer. The inset is an enlarged image

The annealed colloidal monolayer was used as a template to fabricate TiO<sub>2</sub> ring arrays. The ring size was controlled by the annealing time and the precursor concentration in large area. Fig. S3 is a large area (90  $\mu\text{m}$  X 60  $\mu\text{m}$ ) SEM image of the rings.

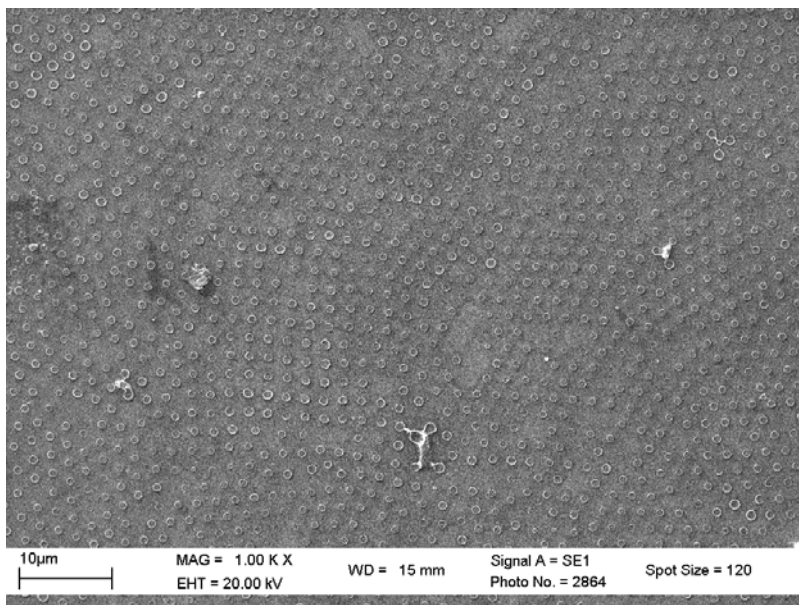

**Fig. S2** Large area ring array fabricated under the same conditions as that of Fig. 5B.

After a two-step heat treatment at 120°C and 400°C, the rings were composed of mostly anatase  $\text{TiO}_2$  with trace amounts of rutile and brookite.

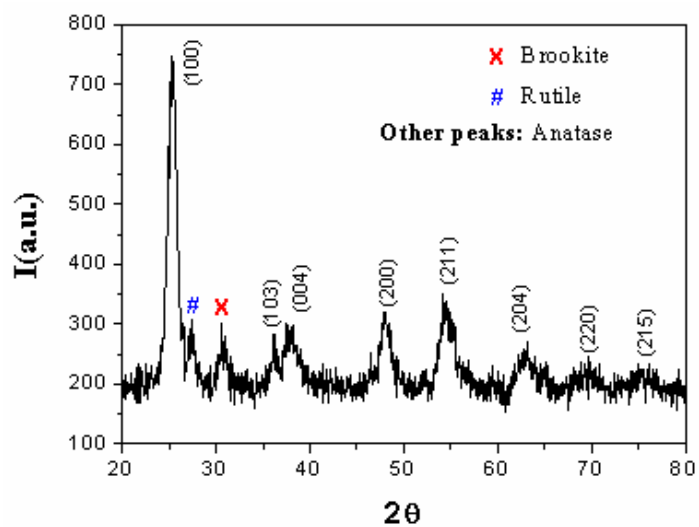

**Fig. S3.** XRD pattern.
